# Supplementary material for: Remote Modular Electronics for Wireless Magnetic Devices
Source: PubMed Central journal article supplement (PMC8425854; doi:10.1002/advs.202101198), 2021-07-10
Supplement: ADVS-8-2101198-s002.pdf [file ADVS-8-2101198-s002.pdf]

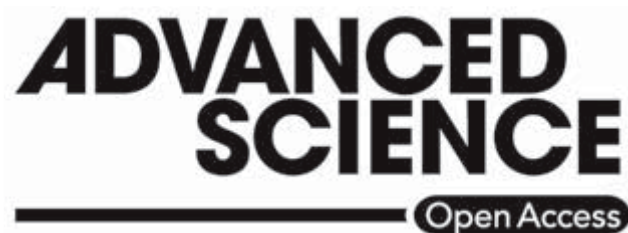

## Supporting Information

for *Adv. Sci.*, DOI: 10.1002/adv.202101198

### **Remote Modular Electronics for Wireless Magnetic Devices**

*Mustafa Boyvat and Metin Sitti\**

# *Supplementary Information*

Mustafa Boyvat and Metin Sitti

## **Supplementary Videos**

Supplementary Video 1: Sequential remote assembly.

Supplementary Video 2: Use of external magnets for assembly.

Supplementary Video 3: Circular geometry formation by remote magnetic forces.

Supplementary Video 4: Circular geometry formation by mechanical stimulation in an all-modules-at-target scenario.

Supplementary Video 5: Circular geometry formation in continuous mechanical stimulation in a sequential and random delivery scenario.

Supplementary Video 6: Remote component replacement.

Supplementary Video 7: Remote geometry extension.

Supplementary Video 8: Assembly and powering of a robotic device with strong SMA actuator.

Supplementary Video 9: Heating distribution and temporal behavior.
